# Supplementary material for: Correlation between serum lipid profiles and cognitive impairment in old age: a cross-sectional study
Source: PubMed Central journal article supplement — Gen Psychiatr. 2023 Apr 28;36(2):e101009. doi: 10.1136/gpsych-2023-101009 (PMC10151832; doi:10.1136/gpsych-2023-101009), 2023-04-28
Supplement: gpsych-2023-101009supp001.pdf [file gpsych-2023-101009supp001.pdf]

Table 1. General characteristics of participants

| Characteristics        | Total            |                      |         |          | Rural            |                      |        |          | Urban            |                      |         |          |
|------------------------|------------------|----------------------|---------|----------|------------------|----------------------|--------|----------|------------------|----------------------|---------|----------|
|                        | Normal cognition | Cognitive impairment | $X^2$   | $P$      | Normal cognition | Cognitive impairment | $X^2$  | $P$      | Normal cognition | Cognitive impairment | $X^2$   | $P$      |
| <b>Gender</b>          |                  |                      | 1.804   | 0.179    |                  |                      | 0.147  | 0.702    |                  |                      | 1.829   | 0.176    |
| Male                   | 1577<br>(46.2%)  | 589<br>(44.1%)       |         |          | 389<br>(45.8%)   | 212<br>(44.7%)       |        |          | 1188<br>(46.3%)  | 377<br>(43.7%)       |         |          |
| Female                 | 1833<br>(53.7%)  | 747<br>(55.9%)       |         |          | 460<br>(54.1%)   | 262<br>(55.2%)       |        |          | 1373<br>(53.6%)  | 485<br>(56.2%)       |         |          |
| <b>Age (years)</b>     |                  |                      | 221.401 | <0.001** |                  |                      | 27.207 | <0.001** |                  |                      | 198.760 | <0.001** |
| 65-69                  | 1672<br>(49.0%)  | 409<br>(30.6%)       |         |          | 343<br>(40.4%)   | 133<br>(28.0%)       |        |          | 1329<br>(51.8%)  | 276<br>(32.0%)       |         |          |
| 70-74                  | 1038<br>(30.4%)  | 413<br>(30.9%)       |         |          | 287<br>(33.8%)   | 166<br>(35.0%)       |        |          | 751<br>(29.3%)   | 247<br>(28.6%)       |         |          |
| 75-79                  | 441<br>(12.9%)   | 255<br>(19.0%)       |         |          | 137<br>(16.1%)   | 99<br>(20.8%)        |        |          | 304<br>(11.8%)   | 156<br>(18.0%)       |         |          |
| ≥80                    | 259<br>(25.9%)   | 259<br>(19.3%)       |         |          | 82<br>(9.6%)     | 76<br>(16.0%)        |        |          | 177<br>(6.9%)    | 183<br>(21.2%)       |         |          |
| <b>Marital status</b>  |                  |                      | 66.648  | <0.001** |                  |                      | 3.756  | 0.053    |                  |                      | 56.078  | <0.001** |
| Married                | 2851<br>(83.6%)  | 978<br>(73.2%)       |         |          | 559<br>(70.5%)   | 310<br>(65.4%)       |        |          | 2252<br>(87.9%)  | 668<br>(77.4%)       |         |          |
| <b>Education level</b> |                  |                      | 84.737  | <0.001** |                  |                      | 2.906  | 0.235    |                  |                      | 82.345  | <0.001** |

|                          |                 |                 |            |              |                |                |       |       |                 |                |            |              |
|--------------------------|-----------------|-----------------|------------|--------------|----------------|----------------|-------|-------|-----------------|----------------|------------|--------------|
| Primary school or below  | 941<br>(27.5%)  | 553<br>(41.4%)  |            |              | 687<br>(80.9%) | 365<br>(77.0%) |       |       | 254<br>(9.9%)   | 188<br>(21.8%) |            |              |
| Middle school            | 1767<br>(51.8%) | 558<br>(41.7%)  |            |              | 149<br>(17.5%) | 101<br>(21.3%) |       |       | 1618<br>(63.1%) | 457<br>(53.0%) |            |              |
| University or above      | 702<br>(20.5%)  | 225<br>(16.9%)  |            |              | 13<br>(1.5%)   | 8<br>(1.6%)    |       |       | 689<br>(26.9%)  | 217<br>(25.1%) |            |              |
| Smoking history (yes)    | 990<br>(29.0%)  | 356<br>(26.6%)  | 2.689      | 0.053        | 258<br>(30.3%) | 155<br>(32.7%) | 0.757 | 0.384 | 732<br>(28.5%)  | 201<br>(23.3%) | 9.016      | 0.003**      |
| Drinking history (yes)   | 793<br>(23.2%)  | 282<br>(21.1%)  | 2.526      | 0.112        | 225<br>(26.5%) | 127<br>(26.7%) | 0.013 | 0.908 | 568<br>(22.1%)  | 155<br>(17.9%) | 6.820      | 0.009**      |
| Physical exercise (yes)  | 2913<br>(85.4%) | 1059<br>(79.2%) | 26.67<br>6 | <0.00<br>1** | 631<br>(74.3%) | 333<br>(70.2%) | 2.548 | 0.111 | 2282<br>(89.1%) | 726<br>(84.2%) | 12.43<br>4 | <0.00<br>1** |
| Cognitive activity (yes) | 2263<br>(66.3%) | 717<br>(53.6%)  | 66.22<br>4 | <0.00<br>1** | 334<br>(39.3%) | 174<br>(36.7%) | 0.891 | 0.345 | 1929<br>(75.3%) | 543<br>(62.9%) | 48.86<br>0 | <0.00<br>1** |
| Eating animal fat (yes)  | 1558<br>(45.6%) | 498<br>(37.2%)  | 27.67<br>5 | <0.00<br>1** | 279<br>(32.8%) | 153<br>(32.2%) | 0.047 | 0.828 | 1279<br>(49.9%) | 345<br>(40.0%) | 25.44<br>3 | <0.00<br>1** |
| Hypertension (yes)       | 2207<br>(64.7%) | 927<br>(69.3%)  | 9.313      | 0.002**      | 584<br>(68.7%) | 336<br>(70.8%) | 0.633 | 0.426 | 1623<br>(63.3%) | 591<br>(68.5%) | 7.598      | 0.006**      |
| Diabetes (yes)           | 549<br>(16.0%)  | 258<br>(19.3%)  | 7.016      | 0.008**      | 101<br>(11.8%) | 63<br>(13.7%)  | 0.915 | 0.339 | 448<br>(17.4%)  | 193<br>(22.3)  | 10.16<br>0 | 0.001**      |
| TC                       |                 |                 | 0.130      | 0.719        |                |                | 0.327 | 0.567 |                 |                | 0.971      | 0.324        |

|            |                 |                |       |            |                |                |       |       |                |                |       |
|------------|-----------------|----------------|-------|------------|----------------|----------------|-------|-------|----------------|----------------|-------|
| High TC    | 1265<br>(37.1%) | 502<br>(37.5%) |       |            | 309<br>(36.3%) | 164<br>(34.5%) |       |       | 956<br>(37.3%) | 338<br>(39.2%) |       |
| TG         |                 |                | 6.420 | 0.011<br>* |                |                | 1.020 | 0.313 |                | 3.180          | 0.075 |
| High TG    | 1098<br>(32.1%) | 379<br>(28.3%) |       |            | 227<br>(26.7%) | 114<br>(24.0)  |       |       | 871<br>(34.0%) | 265<br>(30.7%) |       |
| LDL-C      |                 |                | 0.105 | 0.746      |                |                | 0.375 | 0.540 |                | 0.309          | 0.578 |
| High LDL-C | 798<br>(23.4%)  | 296<br>(22.1%) |       |            | 104<br>(12.2%) | 54<br>(11.3%)  |       |       | 694<br>(27.0%) | 242<br>(28.0%) |       |
| HDL-C      |                 |                | 0.122 | 0.186      |                |                | 0.333 | 0.564 |                | 0.001          | 0.994 |
| Low HDL-C  | 617<br>(18.0%)  | 204<br>(15.2%) |       |            | 74<br>(8.7%)   | 39<br>(8.2%)   |       |       | 282<br>(11.0%) | 95<br>(11.0%)  |       |

---
